# Supplementary material
Source: publisher figshare collection journal article supplement (https://frontiersin.figshare.com/ndownloader/files/12551093)
Supplement: Supplementary file [file 12551093]

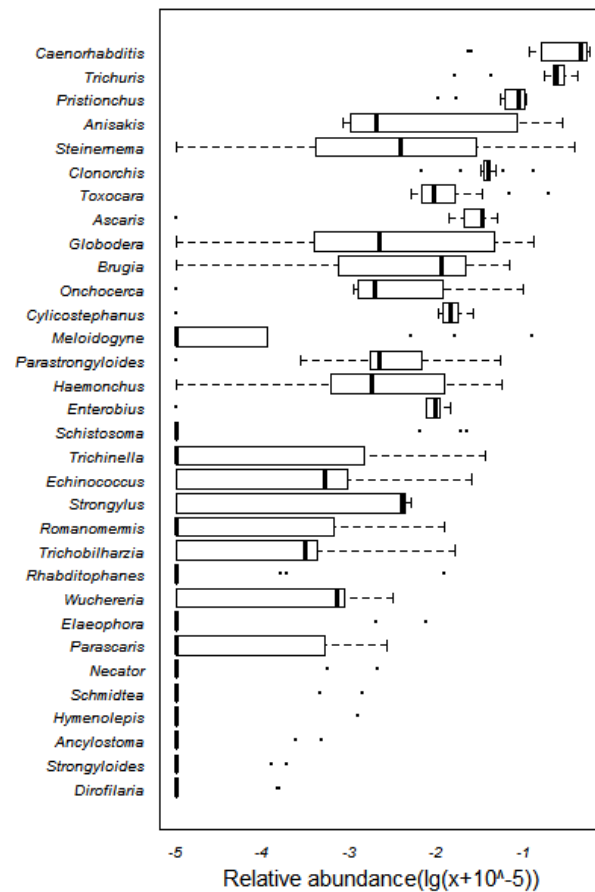

Figure S14 Relative abundance of all helminth genera
